# Supplementary material for: One-step patterning of hollow microstructures in paper by laser cutting to create microfluidic analytical devices
Source: Royal Society of Chemistry journal article supplement (doi:10.1039/c2an36219h), 2012-11-14
Supplement: c2an36219h.pdf [file c2an36219h.pdf]

## Electronic Supplementary Information

### One-step patterning of hollow microstructures in paper by laser cutting to create microfluidic analytical devices

Jinfang Nie,<sup>a</sup> Yuanzhi Liang,<sup>a</sup> Yun Zhang,<sup>\*a</sup> Shangwang Le,<sup>a</sup> Dunnan Li<sup>a</sup> and  
Songbai Zhang<sup>\*b</sup>

<sup>a</sup> College of Chemistry and Bioengineering, Guilin University of Technology, Guilin  
541004, China; Fax: +86 773 5896839; Tel: +86 773 5896453; E-mail:

zy@glite.edu.cn; zy\_hnu@163.com

<sup>b</sup> College of Chemistry and Chemical Engineering, Hunan University of Arts and  
Science, Changde 415000, China; E-mail: sbz\_huas@163.com

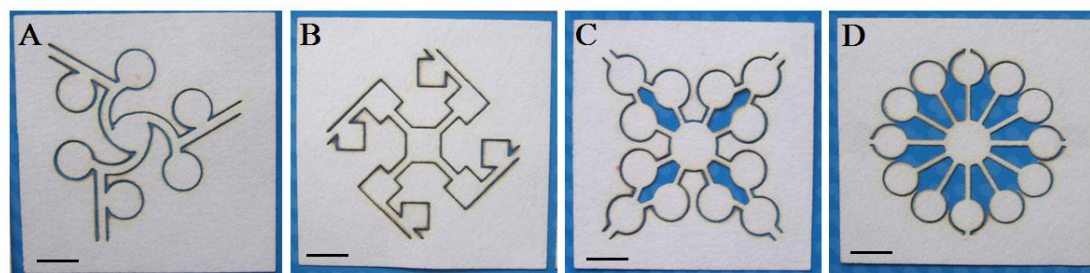

**Fig. S1** The figures of three- (A), four- (B), eight- (C) and twelve-channel (D)  $\mu$ PADs.

Each scale bar is 5 mm.
